# Supplementary material for: Simultaneous NIR photoluminescence and mechanoluminescence from Cr 3+ activated MgGa 2 O 4 phosphors with multifunctions for optical sensing
Source: Royal Society of Chemistry journal article supplement (doi:10.1039/d4tc00059e), 2024-01-01
Supplement: d4tc00059e1.pdf [file d4tc00059e1.pdf]

## Supporting Information

### **Simultaneous NIR photoluminescence and mechanoluminescence from Cr<sup>3+</sup> activated MgGa<sub>2</sub>O<sub>4</sub> phosphors with multifunctions for optical sensing**

*Yaowu Wang,<sup>1</sup> Guocheng Pan,<sup>1</sup> Jianfeng Wang,<sup>2\*</sup> Yinyan Li,<sup>1</sup> Zhenping Wu,<sup>3</sup> Shiqing Xu,<sup>1</sup> Gongxun Bai<sup>1\*</sup>*

<sup>1</sup>College of Optical and Electronic Technology, China Jiliang University, Hangzhou 310018, China

<sup>2</sup>College of Sciences, China Jiliang University, Hangzhou 310018, China

<sup>3</sup>Laboratory of Optoelectronics Materials and Devices, School of Science, Beijing University of Posts and Telecommunications, Beijing 100876, China

Email: jifewang@gmail.com (J Wang), baigx@cjlu.edu.cn (G Bai)

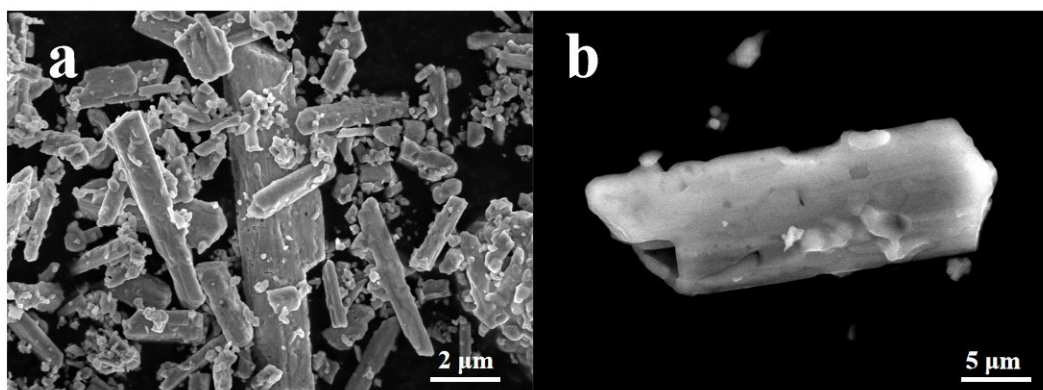

**Fig. S1** (a) The SEM image of MgO:2%Cr<sup>3+</sup> samples. (b) SEM partial enlarged image of MgO:2%Cr<sup>3+</sup> samples.

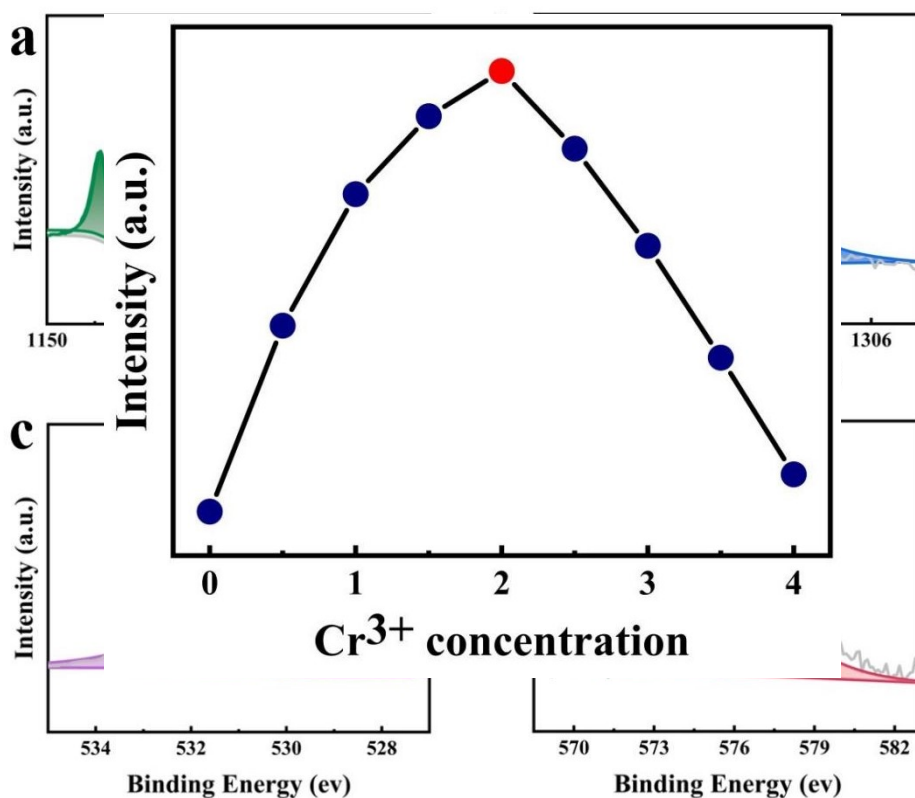

**Fig. S2** (a) The XPS elemental mapping of Ga in MGO:Cr<sup>3+</sup> samples. (b) The XPS elemental mapping of Mg in MGO:Cr<sup>3+</sup> samples. (c) The XPS elemental mapping of O in MGO:Cr<sup>3+</sup> samples. (d) The XPS elemental mapping of Cr in MGO:Cr<sup>3+</sup> samples.

**Fig. S3** The intensities of MGO: $x\%$ Cr<sup>3+</sup> ( $x = 0-4$ ) under 460 nm excitation.

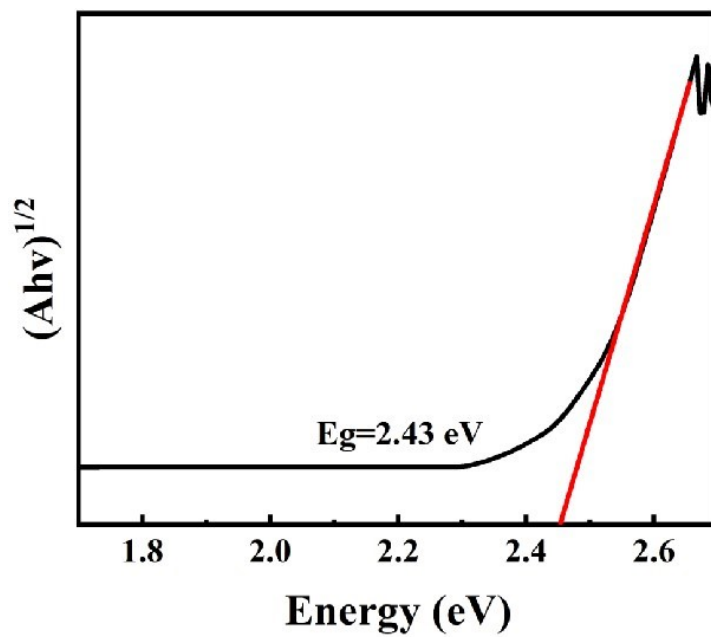

**Fig. S4** The plot of  $[F(R_{\infty})h\nu]^2$  versus energy (eV) of MGO:Cr<sup>3+</sup> sample.



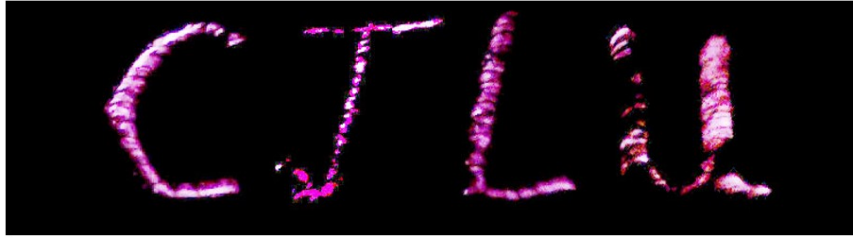

**Fig. S5** Visualization of dynamic pressure tracker with a handwriting "CJLU".
